# Supplementary material for: A robust framework for comparing Lagrangian and gridded Eulerian velocity fields: an example application to surface drifters and altimetry-derived surface currents
Source: Copernicus journal article supplement (doi:10.5194/egusphere-2022-1450), 2022-12-23
Supplement: Supplementary file [file egusphere-2022-1450-AC2-supplement.pdf]

## Authors response to Anonymous Referee #2

**We would like to thank the referee for the time spent reviewing the manuscript in depth. From our point of view, the comments helped us to significantly improve our manuscript, in particular by refocusing the central objective of the article as suggested by the reviewer. We respond (in blue) to each of the reviewer's comments (in black) below and propose a revised manuscript, hoping to meet the expectations.**

### General comments

1. The paper seems to have two goals. One is to propose a new method, another is to validate the satellite velocities on the southern Greenland shelf as the authors make it clear they have a special interest in this region. Rather than being a thorough methods paper, it seems like that authors needed to validate satellite data in this region and part of a process study paper was rewritten as methods paper. Right now these goals seems to be add odds, presenting an objective examination of the skill of a method, versus having a clear interest in the satellite data to come through the validation. This shows in several ways. The only gridded Eulerian data considered is satellite data. This is specified in the title, but needs to be clearer throughout the text. Some Lagrangian methods to deal with data are also not considered. The area where the data is compared is very limited, and is more or less confined to one type of flow regime (a fast boundary current). There are also issues with the latitude (rossby radius and oneven bin sizes) direction of shelf versus the grid. Nearly all aspects of time and variability are ignored, but are a main interest in studies of ocean currents. If this is to be a true methods paper then these issues needs to be addressed and the methods needs to be shown for a more widely representative area.

We agree that the dual motivations for our original submission were perhaps too ambitious for a single manuscript – a fact that was brought up by both reviewers. We have instead rewritten much of the paper to focus on the validation of the altimetry fields around the southern tip of Greenland. This region is particularly important due to its potential for shelf-basin exchange and the supply of fresh polar water masses to the subpolar North Atlantic. The result that the velocity field in this region is well-represented by the altimetry does advance the field because it allows the time-dependency of the flow field to be quantitatively assessed.

### Line by line comments

2. Line 12. "A fluid parcel trajectory"

We agreed with the referee about this comment. We removed this paragraph after changing the focus of the paper.

3. Line 13. Please rephrase. It's not the physical systems that needs to be constrained, but the observations of.

We have deleted this paragraph in the updated manuscript.

4. Lines 40-45. What is completely missing from these questions is the time aspect. How well do methods 1 and 2 do in varying conditions/seasons? In 3, how well is variability captured? Since a large part of oceanographic research is not to understand the mean field, but to explain changes and trends, this is not something that should be neglected.

Data access is an obvious limitation for any project to validate the terrain in a region as remote as Greenland Shelf. We have the benefit of a relatively large data set of 34 drifter tracks for the Greenland shelf region. These drifters have covered the region in about two weeks. Therefore, we have a good amount of data to validate this specific period of summer 2021. To extend this assessment, we replicated the work with the GDP drifters by obtaining a comparable data set but moving over nearly three decades. From this dataset, we observed that the results appear consistent and not only valid for the summer of 2021, but they are clearly not sufficient to evaluate the evolution of accuracy throughout the seasons and years, which seems, with the data available in the whole scientific community, technically unattainable at this time. Indeed, if those data were available, it would not be worth considering the altimetry-derived currents.

5. Lines 63 to 69. It is not clear whether the described example applies to Fig 1. If it does, it would be helpful to zoom out in Fig 1 so one can more clearly see the shelf break and the chosen angles.

The figure 1 (now figure 2) does not seek to describe the velocity components but more illustrate the interpolation method along a drifter trajectory. However, we thank the reviewer for this suggestion, and we added the supplementary figure S2 (copied below) that covers the same area and show an example of the direction of along- and across-shelf velocities.

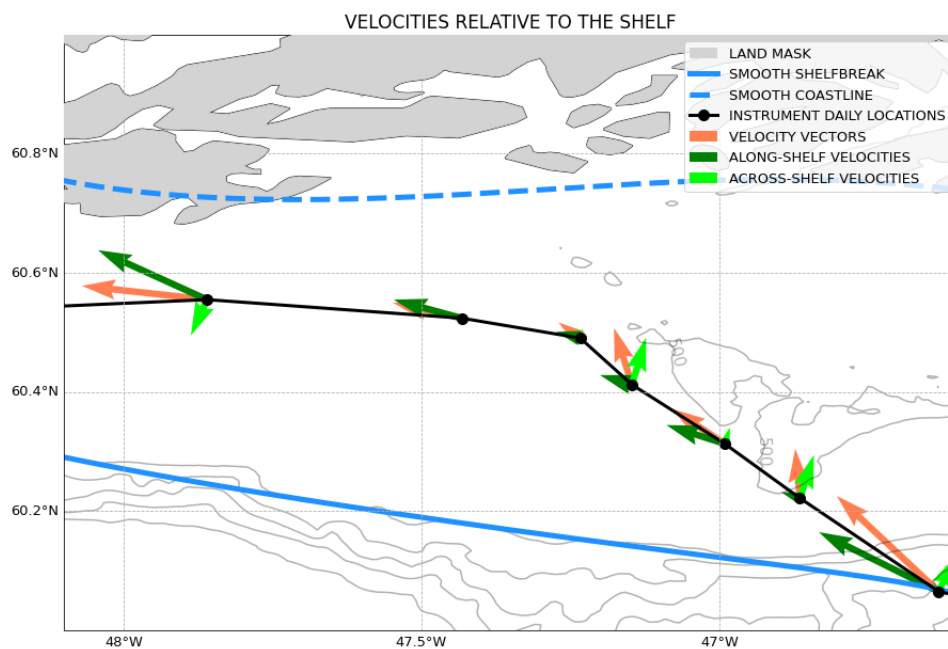

6. A question about this method. By limiting the comparison to discrete grid points, one might introduce artificial mismatches in the comparison. For example, if there is a clear front, or other dividing line between two flow regimes, the nearest grid point may be on the other side of the dividing line while the slightly further grid point may be in the same regime as the Lagrangian measurement. Allowing for interpolation between grid points would remove such artificial mismatches.

We agree with the reviewers that this is a valid concern that was also pointing out by reviewer 1 in their comment 5. We tested the sensitivity of our results to the interpolation methods and presented the results in section 3.1 lines 299-304:

“We tested the sensitivity of our results to the interpolation methods. When comparing the ‘nearest neighbor’ method with linear interpolation, the correlation improved in average by 0.02 the percent

variance explained increased by 2%, but the normalized standard deviation and the Taylor Skill Score both decreased by 0.03 in average. Thus interpolating reduced the variance in the gridded data while improving the correlations. The gridded altimetry is already a smoothed product from the along-track altimetry. We felt that retaining the natural variance is important. Given the similarity between the results, our conclusions from this first step are robust to this choice.”

7. Lines 70 to 74. While several of the comparisons are definitely useful, none of them are actually done in this paper.

In the original manuscript these comparison methods were suggested as general examples for use in this broad framework we outlined. Now that we have refocused the paper on the validation around Greenland, this part has been removed. However, we did use in our specific case three of the four methods proposed (standard deviation, root-mean-square error and the correlation coefficient). We did not use the frequency spectrum because it was not the objective of our comparison, but we added the evaluation of variance explained and the Taylor skill Score.

8. Lines 76 to 78. An important method that is left out here is clustering based on the Lagrangian data density (Koszalka and LaCasce, 2010). This is important because the data density itself provides important information on the flow field, not only in terms of fast and slow, but also in terms of convergence and divergence. This covers also the description of the problems in lines 81 through 83. However, the clustering method is more elegant than the methods proposed here, because it is not bound to fixed cell sizes.

We agree with the reviewer that this more elegant and better in lot of cases, especially when the particles or drifters are relatively homogeneously distributed on the domain. In our case, the sampling of the field by drifters is far from homogeneous, which is why we proposed a methodology to mimic the drifter progression in averaging the ADSC over time. In the figure below, we compared our methodology of resampling to the k-means clustering using 200 clusters containing in average 75 measurements each. While the field returned by the clustering is interesting to look at as it also shows in some sense the main pathways. It is not ideal in our case for a comparison to ADSC because of the drifters’ sampling coverage. Indeed, we obtain a very high density of data point on the shelfbreak along the main pathways but almost no point in many locations. This is for instance the case of the east and south west of Cape Farewell while most of the 8 drifters launched on the shelfbreak (magenta in Fig 1d and 1e) crossed this area. We have integrated this reflection into the revised manuscript in section 2.4.2 lines 215-218.

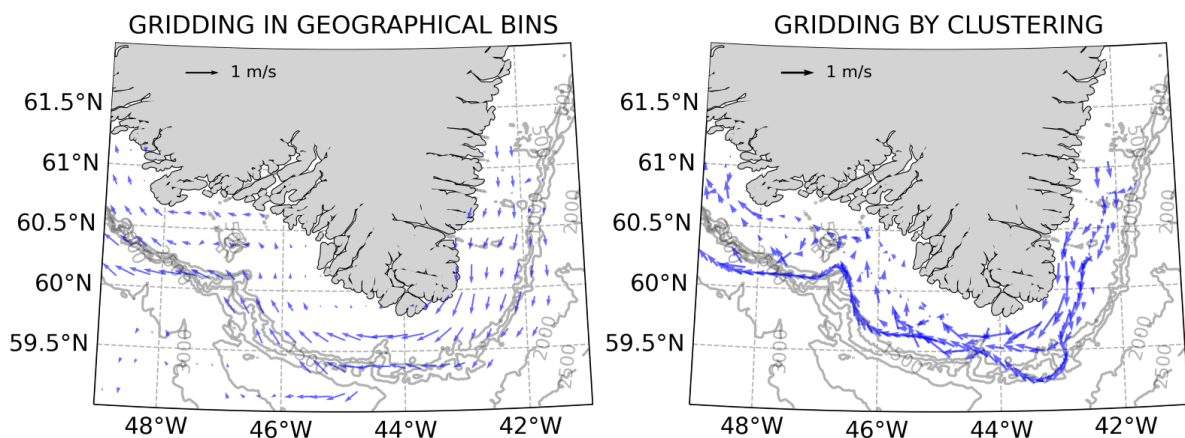

9. Line 119-120. Rephrase the sentence “gridded Eulerian field” versus “time-averaged Eulerian field”. I’m assuming the authors are still referring to Lagrangian data (density), but it’s not clear from the sentence.

Lines 205-207. The way the two Eulerian fields were described here was confusing. The first Eulerian field mentioned is the one computed using the methodology we proposed, which is based on following the progressive sampling of the area by drifters. The second Eulerian field mentioned is obtained by simply averaging the ADSC over time during the entire experiment period. To clarify, we modify the sentence as follows: “To assess whether our results were sensitive to this procedure, we compared the results with this sub-sampled ADSC product with the mean of the entire ADSC fields over the same time period” We hope this revision clarifies our goals.

10. Line 137. Ect... Or, in the case of multiple trajectories, dispersion.

We agree with the reviewer this is an interesting metric to evaluate. To evaluate the importance of dispersion in our region we compute a Péclet number from the drifter trajectories and added the plot to the Figure 1. The Péclet number appears larger than one over the entire domain, with the limited exception immediately following the deployments, meaning that the advection largely dominates the flow. For this reason, we did not investigate the consistency regarding the dispersion.

11. Line 142. More attention could be given to describe what is good or acceptable skill score is here and elsewhere.

We acknowledge that it is difficult to determine what is a good skill score in the synthetic trajectory comparison step. To facilitate interpretation of these skill scores, we compared our scores to the scores obtained by the authors of the methodology (Liu et al.) in a large evaluation experiment in the Gulf of Mexico, as well as to Revelard et al. (2021).

12. Fig 3. Is the black dot at the start indicating a skill score of 0, or is it the start of the trajectory. In the latter case I suggest using a different symbol.

On the figure mentioned, which is now Figure 4 after rearrangement of the manuscript, the black circle indicates a low skill score due to a faster advection simulated by ADSC compared to the displacement observed with the drifter’s trajectory. It is also the location where the drifter was deployed. To clarify this point, we added an orange star under the skill score dot to indicate the drifter deployment location.

13. Lines 172-189. While this is an interesting data set, it is very limited in time and space. Therefore it may not be the best to test these method. See also earlier comments regarding the time aspect that needs to be considered.

We agree with the reviewer’s comment and have completely refocused the paper to address this concern.

14. Line 193 and 205. Would specify more clearly that the original satellite data does not have a daily resolution. The return period of a satellite over a certain track is 10 days. Therefore it is also not clear what the 6-hour resolution could add in information. What additional data would be included in this product that provides information on this time scale?

While we agree with the reviewer that the nominal repeat frequency of a single altimetry satellite is 10 days, there were six altimeters in various orbits, each with different repeat frequencies, during August 2021 when we deployed our surface drifters. The six-hour resolution of the “Geostrophy +

Ekman" product is primarily dictated by the temporal resolution of the wind field, which we clarify on lines 100-102.

15. Lines 244 and onwards. The reader would be helped with interpretation of these results if the authors first gave an explanation on what values represent poor, medium, good and excellent skill scores. Also, what significance level is used to determine if correlations are significant?

We agree with this comment. It is indeed difficult to determine what is a good Taylor Skill Score, this is why we used a reanalysis dataset (TOPAZ4) for comparison. To reinforce the conclusions, the skill score is completed by other metrics that are more easy to understand such as the correlation coefficient (where a typical coefficient between 0.4 and 0.6 presenting a moderate correlation, between 0.6 and 0.8 a high correlation and higher 0.8 a very high correlation), normalized standard deviation or root-mean-square error.

16. Lines 248 to 268. The difference in skill between zonal and meridional velocities is worrisome. If the explanation by the authors is correct, this suggests that the area used is not ideally suited to test this method. It would be more convincing to test the methods with regular boxes (either by design or at lower latitudes) and away from a shelf that is aligned with one direction of the grid.

We agree with the reviewer. This is also a reason that motivated us to refocus the paper on evaluating the altimetry-derived surface currents around the southern tip of Greenland.

17. Line 286. If there is good reason, than it's not surprising. Please rephrase this section.

We thank the reviewer to pointing that inconsistency out. We removed the work "surprisingly" in the revised manuscript, lines 284-285.

18. Fig 5. There quite a number of points with very low skill score and low correlation, which is worrisome and not commented on by the authors.

We have chosen to focus on the averages for the most part in the text because there were not clear systematic errors, and for every low value noted by the reviewer, the average was counterbalanced by a high value (by definition). To ensure that readers will not feel like we are glossing over poor comparisons, we have added text on lines 295-299 to acknowledge the distribution in scores.

19. Fig 6 and line 300. The difference in magnitude of some of these vectors is extremely larger. I am not surprised velocities from altimetry are lower, as a lot of averaging and filtering is applied to this data. I do not subscribe to the authors' interpretation that a factor 2 difference in magnitude is acceptable or very good.

We agree with the reviewer, and have rewritten this sentence in our revised submission. We are specifically commenting on the general structure of the flow field here, not the specifics which we outline in detail in Fig. 7 and the accompanying text.

20. Line 314 to 315. See the general comment on competing interests or focus in the paper. The large differences in the comparison should not be accepted because the authors have a special interest in the shelf break.

Once again, we agree that the example application around the southern tip of Greenland was not an ideal area to evaluate the metrics, especially when we mainly focused on the shelf-basin exchanges. The new focus of the revised manuscript, that does not seek to present and test a novel methodology but evaluate the consistency of ADSC around Greenland, in particular close to the shelf-break, should answer this comment.

21. Line 326. Variance is not addressed.

We agree that the variance has not been estimated in the second step of the methodology. However, we investigated the variance in the point-wise comparison (step 1) and all results indicated an underestimation of the variance of the velocities (Figure 5).

22. Line 370. Are skill scores of 0.55 really “particularly good”? Please keep in mind that these were also calculated for a very limited data set.

Compared to the skill scores obtained by Liu et al. (0.35 for Geostrophy and 0.41 for Geostrophy+Ekman), we think these scores (respectively 0.47 and 0.5) are very good. To improve our confidence in those results, we recomputed the scores following another metric (Revelard et al, 2021) as suggested by the first reviewer. We present those results on the Figure 9. The results obtained are again very good compared to the literature. Below is a copy of the paragraph interpreting these results, which has been added to the manuscript (lines 381-392):

“The mean results decreased from 0.47 and 0.5 respectively for geostrophy and geostrophy+Ekman to 0.33 and 0.36, which remain good compared to skill scores obtained by Liu et al. on the shelf (0.35 and 0.41) without accounting negative values. The skill scores in the large shelf area, highlighted by green hatches, remain very good and only decrease from 0.55 and 0.58 to 0.53 and 0.55 with this new metric. The results in the red shelf area present larger decreases from 0.38 and 0.39 respectively for geostrophy and geostrophy+Ekman to 0.25 and 0.27 but it remains on the order of Liu’s results without negative values. Values using this metric reported in Revelard et al. (2021) from the Ibiza channel were considerably lower, with some regions hitting -0.6. The proportion of negative scores, proposed in Révelard et al. (2021) is also a very informative metric to understand the full picture. In our case for geostrophy (geostrophy+Ekman), we obtained 13.1% (12.2%) of negative scores in the entire region, 7.3% (7.1%) in the red area and 3.4% (3.6%) in the green one. This low proportion of negative values explained the relatively small change of skill scores when accounting negative values, especially in the area of good consistency highlighted in green. The impact of Ekman contribution for this metric (Fig. 9 f) remain very close to the result obtained using the first metric (Fig. 9 c).

23. Line 386. “remarkably capable” is somewhat overstated given also lines 403- 406.

We agree about the overstatement and modify the sentence (lines 411-413) as:

“The combination of all three steps shown us that the altimetry-derived surface currents are capable of recovering the spatial structure of the flow field on the South Greenland Shelf and can mimic the Lagrangian nature of the flow as observed from surface drifters.”

24. Line 407. “remain confident of tracking exchange” . There aspect of exchange is not addressed nor was it validated. Again, it shows a competing interest for the focus of the paper.

We agree that we did not evaluate this specific aspect of the circulation. However, we observed from the second step (Fig. 7) that the current is pretty well resolved, both in direction and magnitude, on the shelf-break. We also agree that there is competing interest for the focus of the paper, and we changed the focus to target the evaluation of ADSC around the south of Greenland.

25. Lines 417 to end. This is indeed a very large caveat and needs to be addressed. See also other comments.

(Line 441 to end) We agree that this is an important caveat, which is why we stated it. We also addressed it to the best extent possible by using the available data from the GDP program to

evaluate the consistency for different seasons and years . The results are detailed in section 5 of the supplementary material. To summarize, the results are as good as the results obtained with our own drifter dataset. From this, we cannot see any reason to conclude that the consistency is specific to the period of intense drifter sampling in summer 2021.
